# Supplementary material for: Role of YAP/TAZ in mechanotransduction
Source: Springer Nature journal article supplement (doi:10.1038/nature10137), 2011-06-01
Supplement: 41586_2011_BFnature10137_MOESM299_ESM.pdf [file 41586_2011_BFnature10137_MOESM299_ESM.pdf]

## Supplementary Table 1 | YAP signature used in Supplementary Fig. 2

Contains the genes commonly upregulated by YAP in human MCF10A cells, mouse NIH3T3 cells and mouse liver as obtained from the merging of data published in Refs.<sup>36-38</sup>.

| Probeset     | Gene     |
|--------------|----------|
| 203002_at    | AMOTL2   |
| 206029_at    | ANKRD1   |
| 1552619_a_at | ANLN     |
| 222608_s_at  | ANLN     |
| 1560318_at   | ARHGAP29 |
| 202686_s_at  | AXL      |
| 213429_at    | NA       |
| 202095_s_at  | BIRC5    |
| 1554283_at   | CCRN4L   |
| 202870_s_at  | CDC20    |
| 224847_at    | CDK6     |
| 204159_at    | CDKN2C   |
| 209172_s_at  | CENPF    |
| 222073_at    | COL4A3   |
| 216898_s_at  | COL4A3   |
| 202551_s_at  | CRIM1    |
| 209101_at    | CTGF     |
| 210764_s_at  | CYR61    |
| 201289_at    | CYR61    |
| 201278_at    | DAB2     |
| 201280_s_at  | DAB2     |
| 210757_x_at  | DAB2     |
| 201279_s_at  | DAB2     |
| 209094_at    | DDAH1    |
| 224790_at    | ASAP1    |
| 221039_s_at  | ASAP1    |
| 224791_at    | ASAP1    |
| 210762_s_at  | DLC1     |
| 224822_at    | DLC1     |
| 201044_x_at  | DUSP1    |
| 208955_at    | DUT      |
| 219787_s_at  | ECT2     |
| 225078_at    | EMP2     |
| 204975_at    | EMP2     |
| 225079_at    | EMP2     |
| 203348_s_at  | ETV5     |
| 204422_s_at  | FGF2     |
| 204421_s_at  | FGF2     |
| 213746_s_at  | FLNA     |
| 201564_s_at  | FSCN1    |
| 208782_at    | FSTL1    |
| 209305_s_at  | GADD45B  |
| 238756_at    | GAS2L3   |

|              |          |
|--------------|----------|
| 202177_at    | GAS6     |
| 203560_at    | GGH      |
| 234192_s_at  | GKAP1    |
| 223378_at    | GLIS2    |
| 211414_at    | GLS      |
| 223079_s_at  | GLS      |
| 221510_s_at  | GLS      |
| 201944_at    | HEXB     |
| 207165_at    | HMMR     |
| 222126_at    | AGFG2    |
| 1555349_a_at | ITGB2    |
| 202803_s_at  | ITGB2    |
| 201125_s_at  | ITGB5    |
| 218656_s_at  | LHFP     |
| 232168_x_at  | MACF1    |
| 201668_x_at  | MARCKS   |
| 217599_s_at  | MDFIC    |
| 1554126_at   | MSRB3    |
| 225790_at    | MSRB3    |
| 225080_at    | MYO1C    |
| 200632_s_at  | NDRG1    |
| 219165_at    | PDLIM2   |
| 201397_at    | PHGDH    |
| 210139_s_at  | PMP22    |
| 204030_s_at  | SCHIP1   |
| 222717_at    | SDPR     |
| 218711_s_at  | SDPR     |
| 202627_s_at  | SERPINE1 |
| 229674_at    | SERTAD4  |
| 235579_at    | SFRS2IP  |
| 201739_at    | SGK1     |
| 219749_at    | SH2D4A   |
| 219493_at    | SHCBP1   |
| 230130_at    | SLIT2    |
| 209897_s_at  | SLIT2    |
| 200783_s_at  | STMN1    |
| 220407_s_at  | TGFB2    |
| 209908_s_at  | TGFB2    |
| 228121_at    | TGFB2    |
| 209909_s_at  | TGFB2    |
| 211573_x_at  | TGM2     |
| 201042_at    | TGM2     |
| 201109_s_at  | THBS1    |
| 201108_s_at  | THBS1    |
| 201110_s_at  | THBS1    |
| 202338_at    | TK1      |
| 215389_s_at  | TNNT2    |
| 218864_at    | TNS1     |
| 201292_at    | TOP2A    |
| 200973_s_at  | TSPAN3   |

**Supplementary Table 2 | sequences of siRNA used in this study**

| <b>siRNA</b> | <b>SENSE STRAND SEQUENCE</b> |
|--------------|------------------------------|
| YAP 1        | GACAUCUUCUGGUCAGAGA dTdT     |
| YAP 2        | CUGGUCAGAGAUACUUCUU dTdT     |
| TAZ 1        | ACGUUGACUUAGGAACUUU dTdT     |
| TAZ 2        | AGGUACUUCCUCAUCACA dTdT      |
| LATS1 A      | CACGGCAAGAUAGCAUGGA dTdT     |
| LATS1 B      | CAUACGAGUCAAUCAAGAA dTdT     |
| LATS2 A      | AAAGGCGUAUGGCGAGUAG dTdT     |
| LATS2 B      | GCCACGACUUUUCUGGAA dTdT      |
| Control      | UUCUCCGAACGUGUCACGU dTdT     |

YAP/TAZ mix #1 is composed of oligos YAP1 and TAZ1; YAP/TAZ mix #2 is composed of oligos YAP2 and TAZ2; LATS1/2 mix A is composed of oligos LATS1A and LATS2A; LATS1/2 mix B is composed of oligos LATS1B and LATS2B.

**Supplementary Table 3 | sequences of RT-PCR primers used in this study**

| <b>GENE</b> | <b>PRIMER NAME</b> | <b>PRIMER SEQUENCE</b> |
|-------------|--------------------|------------------------|
| GAPDH       | GAPDH F            | CTCCTGCACCACCAACTGCT   |
|             | GAPDH R            | GGCCATCCACAGTCTTCTG    |
| ANKRD1      | ANKRD1 FOR         | AGTAGAGGAACTGGTCACTGG  |
|             | ANKRD1 REV         | TGGGCTAGAAGTGTCTTCAGAT |
| CTGF        | CTGF F2            | AGGAGTGGGTGTGTGACGA    |
|             | CTGF R2            | CCAGGCAGTTGGCTCTAATC   |
| LATS1       | LATS1 L1           | CTCTGCACTGGCTTCAGATG   |
|             | LATS1 R1           | TCCGCTCTAATGGCTTCAGT   |
| LATS2       | LATS2 L1           | ACATTCAGTGGTGGGGACTC   |
|             | LATS2 R1           | GTGGGAGTAGGTGCCAAAAA   |

Primers used for the molecular characterization of hMSC differentiation were as in Ref.<sup>12</sup>.

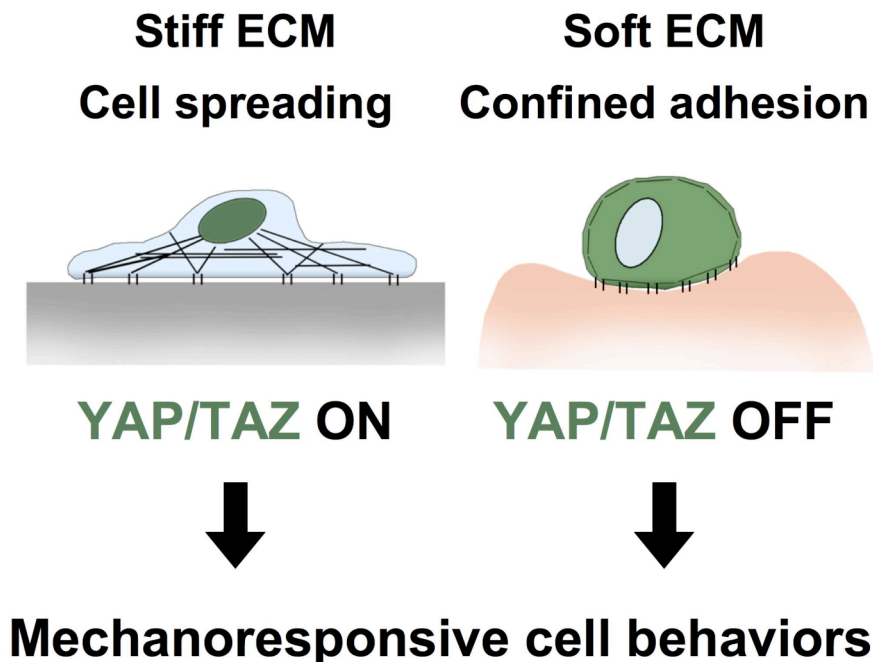

**Supplementary Figure 1** | A model for the role of YAP/TAZ as readers and effectors of cell behavior induced by the mechanical/physical properties of the cellular microenvironment, such as ECM stiffness, cell spreading and cytoskeletal tension. On the left: Cells growing on stiff substrates (indicated in grey) can develop cytoskeletal tension by pulling on the ECM, which permits the maturation of cell-substrate adhesions<sup>3</sup> (indicated by the symbol ||) and the development of stress-fibers (indicated by the black lines in the cytoplasm). In these conditions, YAP/TAZ transcriptional coactivators (indicated in green) accumulate in the nucleus and can regulate gene transcription, enabling cells to behave according to the mechanical microenvironment. On the right: Cells growing on soft substrates (indicated in pink) cannot develop cytoskeletal tension and display reduced or no stress-fibers (black lines abutting the cell membrane indicate the formation of the cortical F-actin cytoskeleton). In these conditions, YAP/TAZ are excluded from the nucleus and accumulate in the cytoplasm (now stained in green). In this case, it is the absence of YAP/TAZ transcriptional activity that instructs cell behavior in response to the microenvironment.

| signaling pathway     | p-value                     |
|-----------------------|-----------------------------|
| TGF-beta <sup>a</sup> | 0.997                       |
| TGF-beta <sup>b</sup> | 0.286                       |
| Ras                   | 0.170                       |
| ERBB2                 | 0.551                       |
| <b>YAP/TAZ</b>        | <b>&lt; 10<sup>-5</sup></b> |
| <b>YAP</b>            | <b>&lt; 10<sup>-5</sup></b> |
| Wnt                   | not represented             |
| beta-catenin          | not represented             |
| Notch                 | 0.997                       |
| NICD                  | 0.997                       |
| NF-kappaB             | 0.997                       |
| MAL/SRF <sup>a</sup>  | 0.086                       |
| MAL/SRF <sup>b</sup>  | 0.125                       |

**Supplementary Figure 2** | Over-representation of YAP/TAZ target genes among the genes regulated by substrate stiffness in NMuMG mouse Mammary Epithelial Cells (MEC). Over-representation analysis was performed using one-sided Fisher's exact test (p-value<0.05). p-values were adjusted for False Discovery Rate (FDR<5%) (see Methods). Gene-sets highlighting activation of specific signaling pathways were derived from previously defined gene-expression signatures (see Methods for Refs.). Genes of WNT and  $\beta$ -catenin signatures were not represented in the stiffness signature. In yellow: over-representation reaches statistical significance only for the YAP/TAZ signatures.

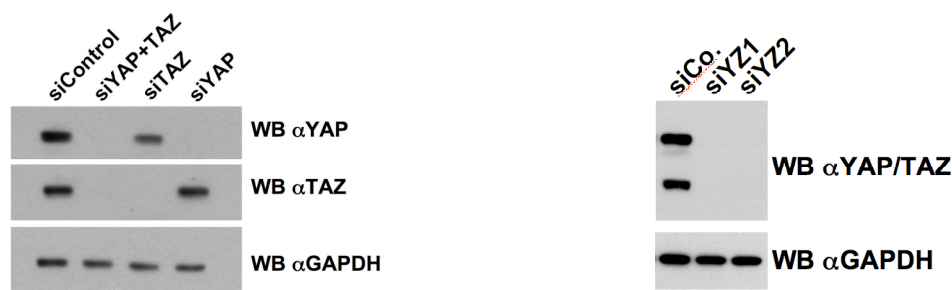

**Supplementary Figure 3a** | LEFT PANEL: Lysates of MCF10A cells transfected with the indicated siRNAs (siYAP #1 and siTAZ #1) and subjected to western blotting to ensure specific depletion of the endogenous proteins. RIGHT PANEL: Western blotting of MCF10A with an anti-YAP/TAZ antibody shows comparable quantitative knockdown of YAP (upper band) and TAZ (lower band) endogenous protein levels by two independent YAP/TAZ siRNA sets (siYZ1 and siYZ2), as compared to cells transfected with control siRNA (siCo.).

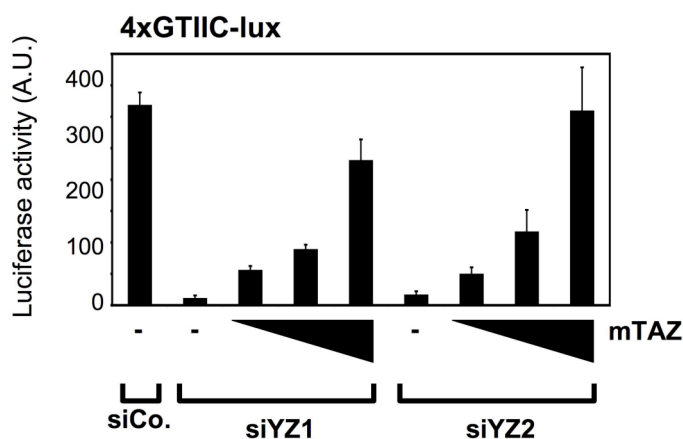

**Supplementary Figure 3b** | MDA-MB-231 cells were transfected with control siRNA (siCo.) or with two combinations of YAP/TAZ siRNA (siYZ1 and siYZ2); the day after, cells were transfected with 4xGTIIC-lux reporter and with increasing doses of mTAZ expression plasmid (insensitive to siRNAs against hTAZ) as indicated. Both YAP/TAZ siRNAs combinations down-regulate YAP/TAZ activity, and this is rescued by mouse TAZ, showing specificity of the YAP/TAZ depletion. Data are mean and SD (n=6).

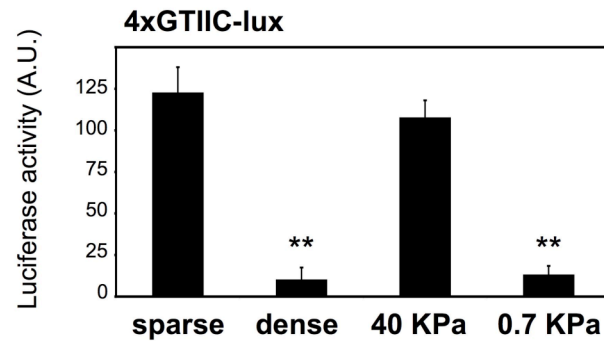

**Supplementary Figure 4** | The activity of a YAP/TAZ-responsive synthetic promoter driving luciferase expression is similarly regulated by high confluence and by substrate rigidity in HeLa cells. Cells were transfected with 4xGTIIC-lux reporter and plated at low or high confluence (sparse and dense respectively) on plastics, and at low confluence on stiff (40 KPa) or soft (0.7 KPa) fibronectin-coated hydrogels. Data are presented as mean and SD (n=6; \*\* $P$ <0.01).

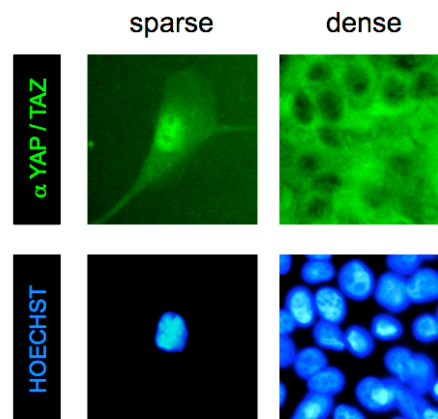

**Supplementary Figure 5** | Confocal IF images for endogenous YAP/TAZ and nuclei (Hoechst) of human MEC plated at low (sparse) or high (dense) confluence for 48 hours.

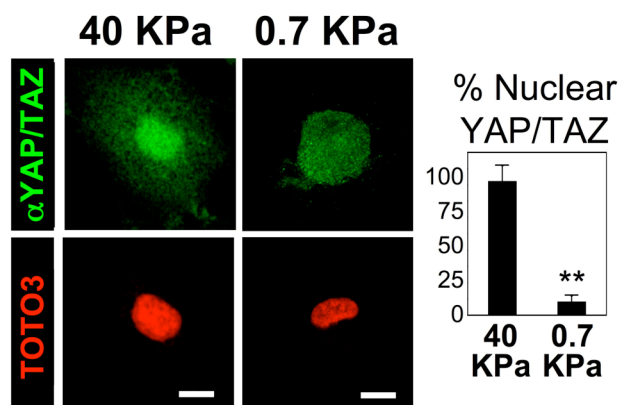

**Supplementary Figure 6** | ECM stiffness regulates YAP/TAZ nuclear localization. Confocal immunofluorescence (IF) images of YAP/TAZ (green) and nuclei (red) of NMuMG MEC plated on stiff (40KPa) and soft (0.7KPa) fibronectin-coated acrylamide hydrogels. White bars = 15 $\mu$ m. Graphs on the right indicate the ratio of cells with nuclear YAP/TAZ; data are mean and SD (n=3; \*\* $P < 0.01$ ).

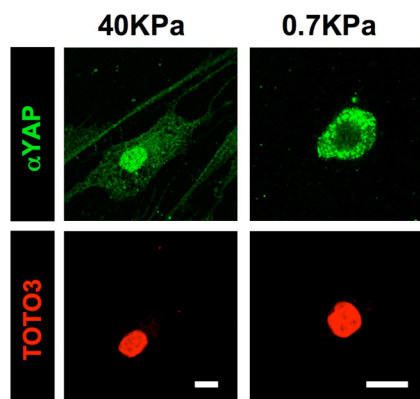

**Supplementary Figure 7** | Relocalization of endogenous YAP in hMSC plated on stiff (40 KPa) and soft (0.7 KPa) matrices as seen by confocal IF by using an alternative anti-YAP antibody to that used in other panels. TOTO3 staining identifies nuclei. White bars = 15  $\mu$ m.

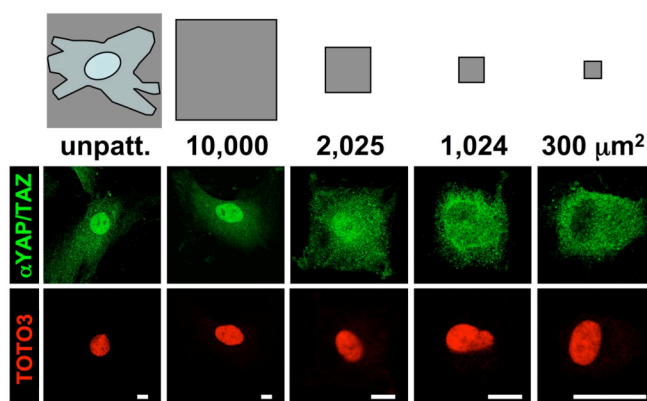

**Supplementary Figure 8** | This refers to Figure 1c of the main text. Confocal IF images of endogenous YAP/TAZ (also shown in Fig. 1c) together with their corresponding nuclei (TOTO3) in hMSC plated on microprinted fibronectin islands of decreasing size. White bars = 15 $\mu$ m.

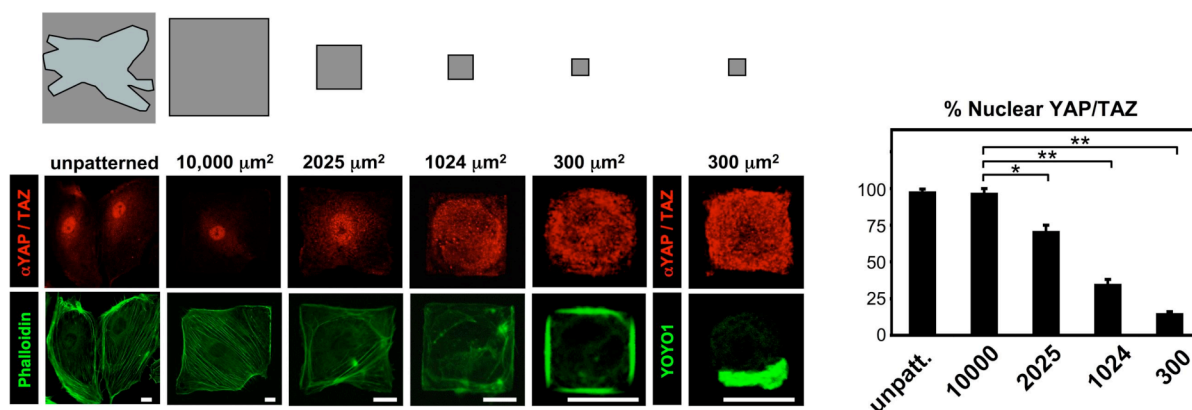

**Supplementary Figure 9** | This refers to Figure 1d of the main text. Constraining cell shape regulates YAP/TAZ nuclear localization also in Human Microvascular Endothelial Cells (HMVEC). Confocal IF images of endogenous YAP/TAZ and actin filaments (phalloidin) in HMVEC plated on microprinted fibronectin islands of decreasing size ( $\mu\text{m}^2$ ). White bars = 15 $\mu$ m. On the right: IF images of YAP/TAZ and the nucleus (YOYO1) of a cell plated on the smallest island. The pictures of cells plated on 10,000 and 300  $\mu\text{m}^2$  are the same of Fig. 1d, shown here with representative cells on islands of intermediate sizes for completeness. Right graphs provide complete quantifications. Data are mean and SD (n=7; \* $P$ <0.05, \*\* $P$ <0.01).



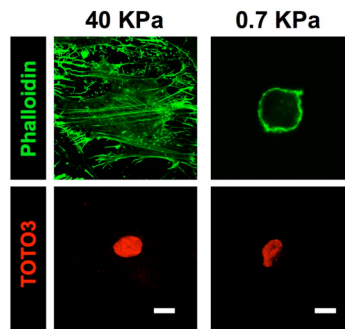

**Supplementary Figure 10** | Confocal IF images of hMSC plated on substrate of different stiffness (40 and 0.7 KPa) and stained for F-actin (Phalloidin) and nuclei (TOTO3). White bars = 15 μm.

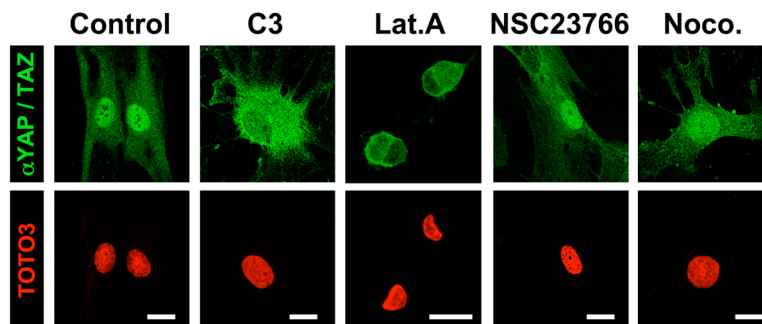

**Supplementary Figure 11** | IF images of hMSC shown in Fig. 2a, here presented with their corresponding nuclear stainings (TOTO3).

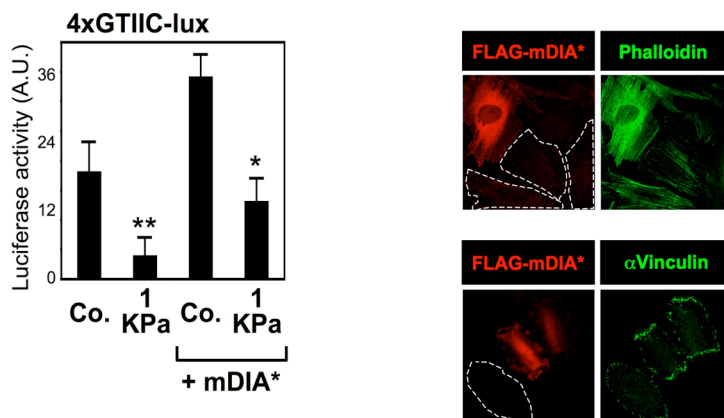

**Supplementary Figure 12** | LEFT: Overexpression of activated Diaphanous (mDIA\*) enhances YAP/TAZ transcriptional activity as assayed by luciferase activity in HeLa cells plated on plastics (Co.) or on soft ECM (1 KPa). Data are mean and SD (n=3; \* $P$ <0.05, \*\* $P$ <0.01). RIGHT, Upper panel: confocal IF images of HeLa cells transiently transfected with activated Diaphanous (FLAG-mDIA\*). Transfected cells are stained with anti-FLAG (red channel). Staining with Phalloidin (green channel) shows enhanced stress-fibers in cells expressing active Diaphanous. Cells encircled by white dotted lines are non-transfected cells displaying background anti-FLAG staining and serve as internal controls. RIGHT, Lower panel: confocal IF images of HeLa cells transiently transfected with activated Diaphanous and mCherry as tracer (red channel) and stained for focal adhesions (Vinculin – green channel). Enhanced vinculin recruitment to focal adhesions in cells expressing mDIA\* is suggestive of increased cytoskeletal tension<sup>30,31</sup>.

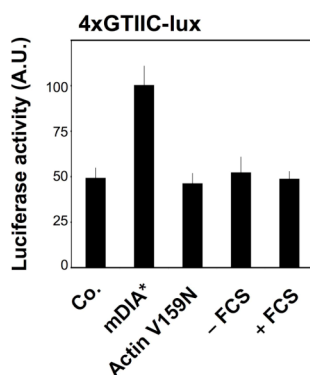

**Supplementary Figure 13** | Overexpression of actin V159N and serum stimulation are unable to enhance YAP/TAZ. HeLa cells were transfected with 4xGTIIC-lux reporter together with empty vector (Co.), with activated Diaphanous (mDIA\*), with a plasmid encoding for V159N actin, or starved overnight without serum (- FCS) and subsequently treated with 20% serum (+ FCS). Data are mean and SD (n=5).

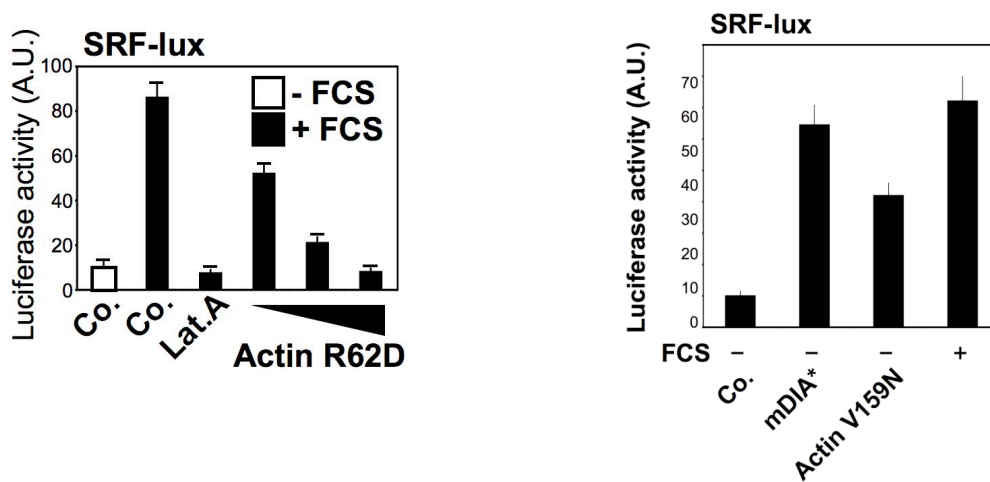

**Supplementary Figure 14** | Positive controls for the activity of the R62D and V159N actin mutants used in Fig. 2c and Supplementary Fig. 13. LEFT: MAL/SRF-responsive element (SRF-lux) activity in HeLa cells treated as indicated and transfected with R62D actin, using the same plasmid doses as in Fig. 2c. RIGHT: HeLa cells transfected with SRF-lux, showing effective enhancement of MAL/SRF activity upon expression of mDIA\*, V159N actin and FCS (20% serum) stimulation. Plasmid doses used were the same as in Supplementary Fig. 13. Co. indicates transfection with empty vector. All data are mean and SD (n=5).

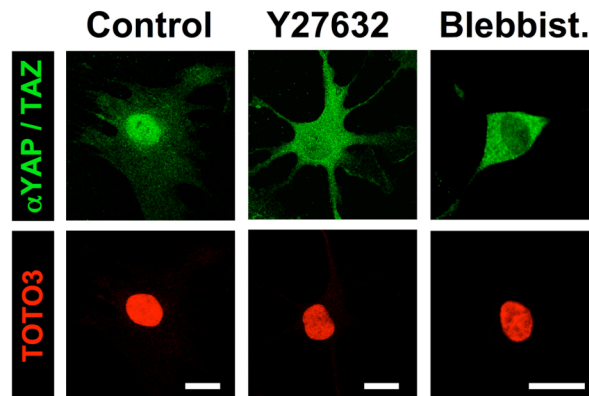

**Supplementary Figure 15** | IF images of hMSC shown in Fig. 2d, here presented with their corresponding nuclear stainings (TOTO3).

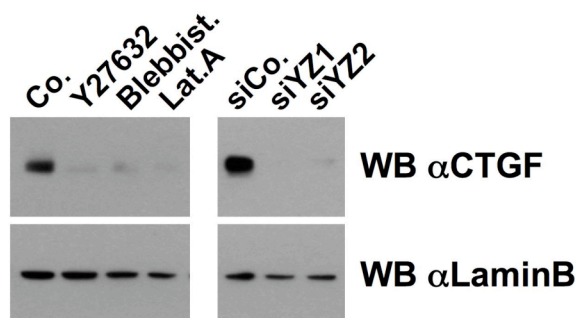

**Supplementary Figure 16** | Western blots for endogenous CTGF protein levels in MDA-MB-231 cells untreated (Co.), treated with the indicated inhibitors of ROCK (Y27632), Myosin (Blebbistatin) and F-actin (LatrunculinA), or transfected with the indicated siRNAs. LaminB ensures uniform loading.

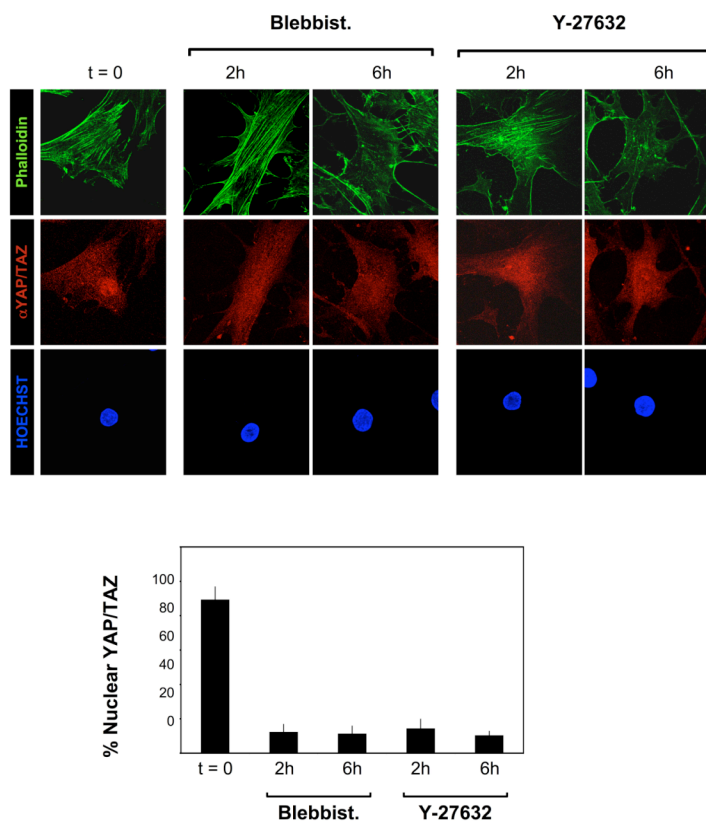

**Supplementary Figure 17** | Confocal IF images of hMSC cells plated on fibronectin-coated glass slides and treated for different periods (2 and 6 hours, respectively) with the indicated inhibitors of ROCK (Y27632) or non-muscle myosin (Blebbistatin). Cells were stained for YAP/TAZ (red channel), F-actin (Phalloidin – green channel) and nuclei (Hoechst – blue channel). Graphs provide the quantifications of nuclear YAP/TAZ. Data are mean and SD (n=3). Note how inhibition of cytoskeletal tension after 2 hours influences YAP/TAZ localization before affecting stress-fiber integrity.

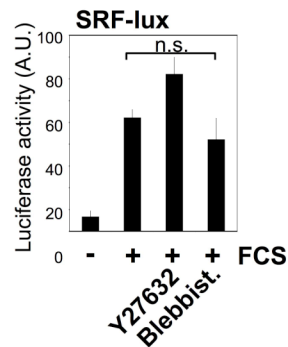

**Supplementary Figure 18** | Cytoskeletal tension marginally sustains MAL/SRF activity. HeLa cells were transfected with a MAL/SRF-responsive element reporter (SRF-lux), left for 24h in the absence of serum (fetal calf serum, FCS), and subsequently supplemented (+) of serum (20%) without or with the indicated inhibitors of ROCK (Y27632 50 $\mu$ M) and non-muscle myosin II (Blebbistatin 50 $\mu$ M) for 6 more hours. Data are mean and SD; n.s. not statistically significant (n=2).

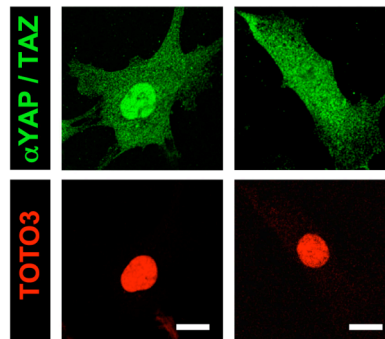

**Supplementary Figure 19** | IF images of hMSC shown in Fig. 2f, here presented with their corresponding nuclear stainings (TOTO3).

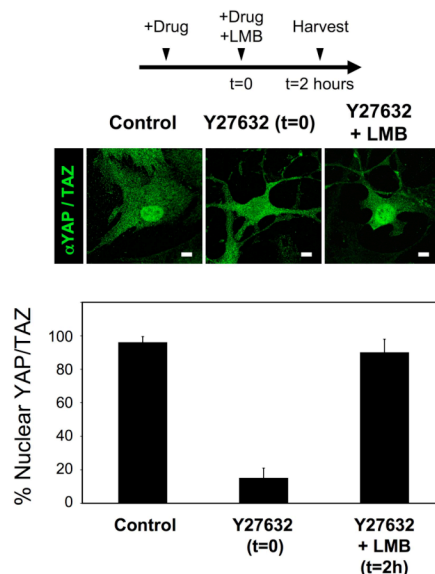

**Supplementary Figure 20a** | YAP/TAZ localization is regulated by cytoskeletal tension at the level of nuclear retention. YAP/TAZ confocal immunofluorescent microscopy of hMSC plated on fibronectin-coated slides and treated with the ROCK inhibitor Y27632 to exclude YAP/TAZ from nuclei (t=0) and then also treated with the inhibitor of CRM1-dependent nuclear export Leptomycin B (LMB, 40ng/ml) for 2 additional hours. Quantifications are shown as mean and SD (n=3). LMB treatment restores YAP/TAZ nuclear localization in cells with relaxed actomyosin cytoskeleton. Similar results were obtained by treating cells with the Rho inhibitor C3 (not shown). White bars = 15 $\mu$ m.

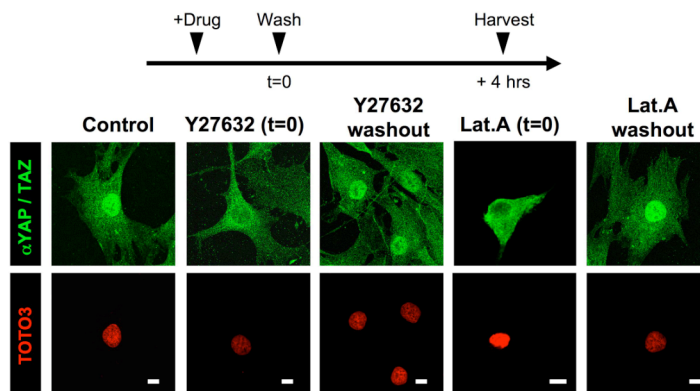

**Supplementary Figure 20b** | Confocal IF pictures of hMSC that were plated on fibronectin-coated glass, and treated with the indicated small molecule inhibitors to cause YAP/TAZ exclusion (t=0). Y27632 is a ROCK inhibitor; LatrunculinA (Lat.A) is an F-actin inhibitor. Inhibitors were then removed (washout) and cells were incubated in normal medium for 4 more hours before fixation. White bars = 15  $\mu$ m.

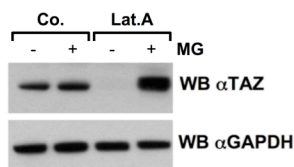

**Supplementary Figure 21** | LatrunculinA treatment induces proteasomal-dependent degradation of TAZ. Human MEC were either untreated (Co.) or treated 4 hours with LatrunculinA (Lat.A), without (-) or with (+) the addition of the proteasome inhibitors MG132/MG115 (MG - 10 $\mu$ M each) and then harvested for western blotting.

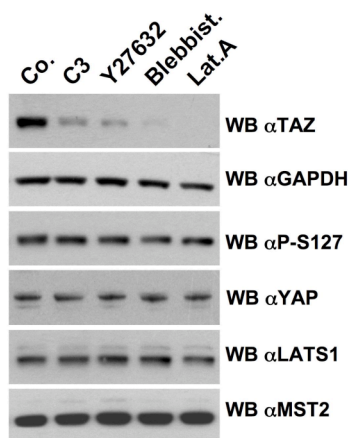

**Supplementary Figure 22** | Treatment of hMSC with Rho inhibitor C3 or with cytoskeletal inhibitors as in Fig. 2a or 2d causes TAZ degradation, as assayed by western blotting of cell lysates. Note how the levels of YAP serine127 phosphorylation (P-S127, a readout of LATS kinase activity) were not increased. Also the stability of YAP, LATS1 and MST2 was not affected.

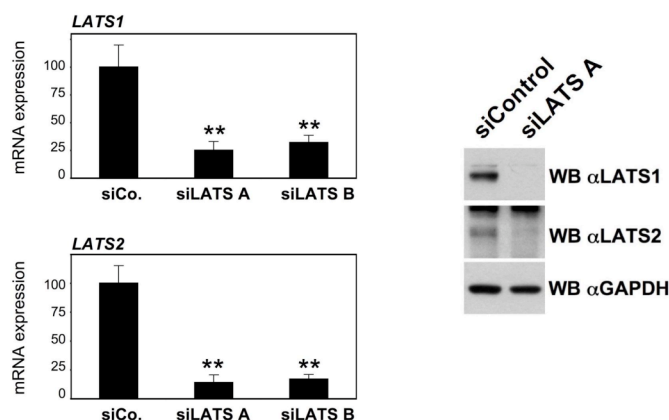

**Supplementary Figure 23a** | Human MEC were transfected with two independent sets of siRNA targeting LATS1 and LATS2, and analyzed by qRT-PCR (left panels) or western blotting (WB – right panels) to prove efficient knockdowns of the endogenous mRNA and proteins (similar WB results were obtained with siLATS B). Data are mean and SD (n=3; \*\* $P < 0.01$ ).

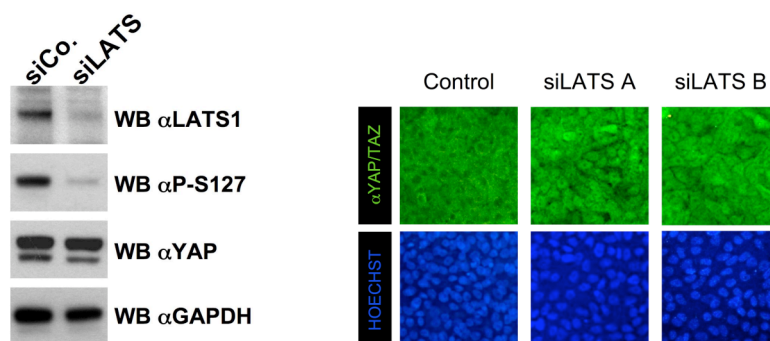

**Supplementary Figure 23b** | LEFT: Human MEC were transfected with the indicated siRNA, replated at low confluence and cultivated for 2 days before harvesting for western blotting. Upon LATS knockdown, YAP phosphorylation on serine127 is also decreased. Similar results were obtained with siLATS B. RIGHT: Human MEC were transfected with the indicated siRNA and replated at high confluence. After 2 days cells were analyzed for endogenous YAP/TAZ localization by immunofluorescence microscopy. Cell nuclei were visualized by Hoechst staining. Note the increased nuclear staining upon LATS knockdown.



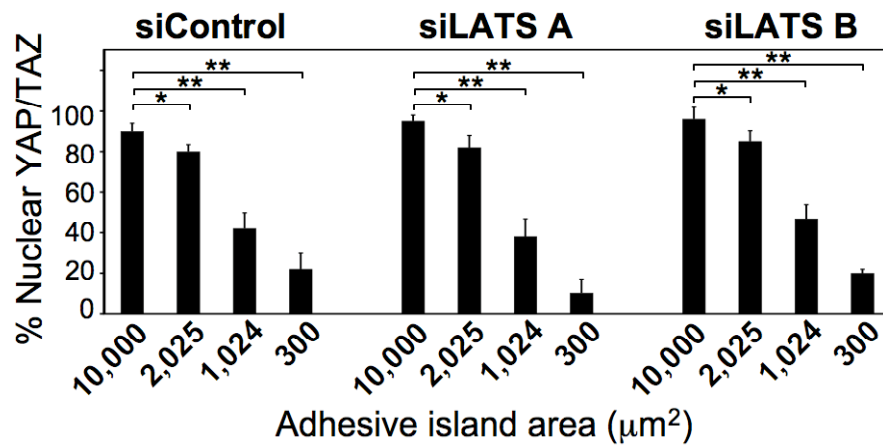

**Supplementary Figure 24** | Quantification of nuclear YAP/TAZ in hMSC transfected with control- or LATS-siRNA (with two independent LATS siRNA oligo sets indicated with A and B) and plated on microprinted fibronectin islands. Results with control- and LATS-siRNA #A are the same shown in Fig. 3d of the main text. Data are mean and SD (n=4; \* $P$ <0.05, \*\* $P$ <0.01).

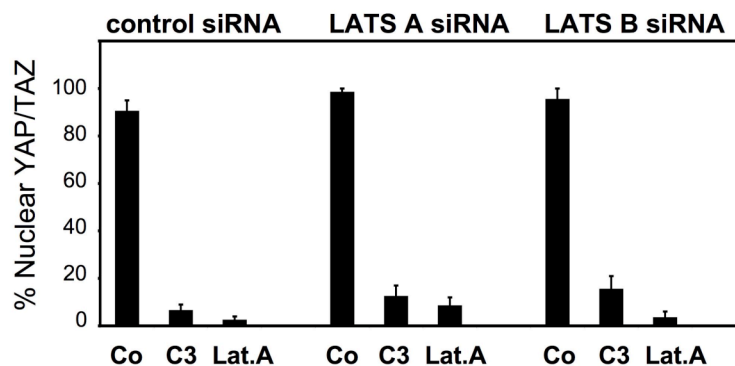

**Supplementary Figure 25** | hMSC were transfected with the indicated siRNAs and replated on fibronectin-coated glass. Cells were then treated for 4 hours, where indicated, with the Rho inhibitor C3 or the F-actin inhibitor LatrunculinA (Lat.A), and fixed for IF. Confocal IF images were used to quantify the percentage of cells displaying nuclear YAP/TAZ staining. Data are mean and SD (n=5).

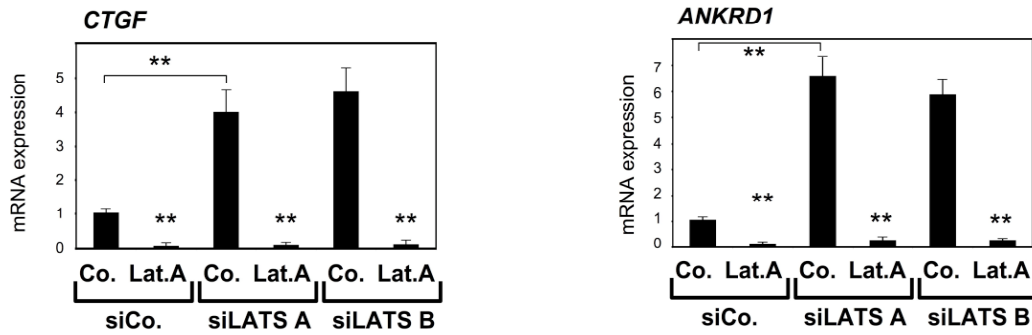

**Supplementary Figure 26** | Real-time PCR analysis of the YAP/TAZ transcriptional targets *CTGF* and *ANKRD1* in MCF10A MEC. Cells were transfected with the indicated siRNA and replated at low confluence on fibronectin-coated 40 KPa hydrogels; after 1 day cells were left untreated (Co.) or treated for 24 hours with the F-actin inhibitor LatrunculinA (Lat.A), and harvested for qRT-PCR. Data are mean and SD (n=3; \*\*P<0.01). The experiments shown here were performed together with the ones shown in Fig. 3f of the main text, such that the untreated samples of this panel (Co.) are the same bars of the controls lanes in Fig. 3f (40KPa).

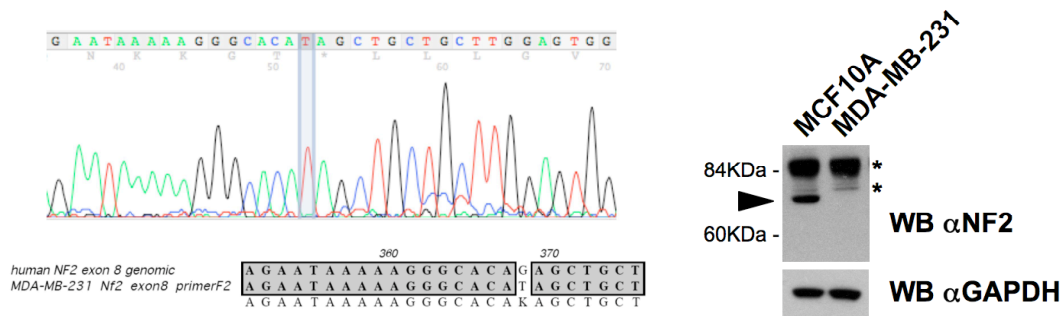

**Supplementary Figure 27** | LEFT: Sequencing of the genomic locus of *NF2/merlin* in MDA-MB-231 cells reveals a non-sense mutation within exon8, causing a stop codon (\*). Below the chromatogram, the alignment of the nucleotide sequences of MDA-MB-231 cells and the consensus human genome (NCBI) encompassing the mutation is shown. All other exons were normal (not shown). Likely due to nonsense mRNA decay, we could not detect *NF2* mRNA by RT-PCR in MDA-MB-231 cells, as compared to MCF10A (not shown). RIGHT: Western blotting of MCF10A and MDA-MB-231 cell extracts for NF2/merlin (indicated by the black arrowhead). The anti-NF2 antibody recognizes two additional bands (indicated by asterisks) that are aspecific as judged by anti-NF2 siRNA transfection (not shown).

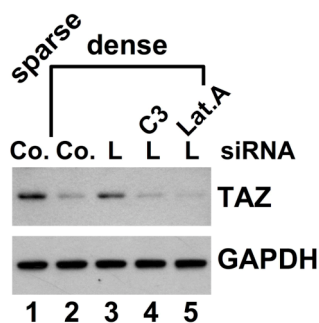

**Supplementary Figure 28** | Panel shows western blotting of lysates from MCF10A cells transfected with control siRNAs (Co.) and cultured under sparse and confluent (dense) conditions (lanes 1 and 2). Confluent cells transfected with LATS siRNA #A (L) were either left untreated (lane 3) or treated with C3 or LatrunculinA (Lat.A) for 6 hours before harvesting (lanes 4 and 5).

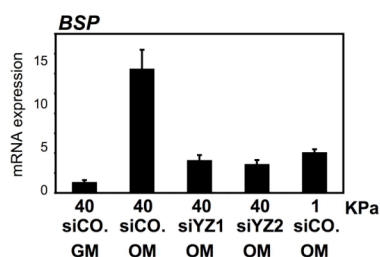

**Supplementary Figure 29** | Real time PCR for the osteogenic marker *BSP* (*bone sialoprotein*) on hMSC. Cells were transfected with the indicated siRNAs, plated on hydrogels of 40 or 1KPa, and either left in growth medium (GM) or induced to differentiate (OM – see methods). Data are mean and SD (n=2).

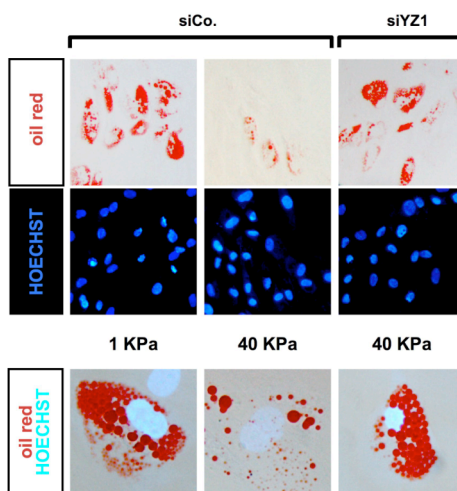

**Supplementary Figure 30** | Top row: low magnification pictures of representative oil-red stainings of hMSC whose quantification is showed in Fig. 4c. Hoechst staining shows nuclei of the same cells of the oil-red pictures above. Bottom row: close-up of representative differentiated hMSC. Note how the differences in adipogenic differentiation between samples were not only quantitative (i.e. number of cells displaying oil-red staining) but also qualitative (i.e. amount of vacuoles per cells).

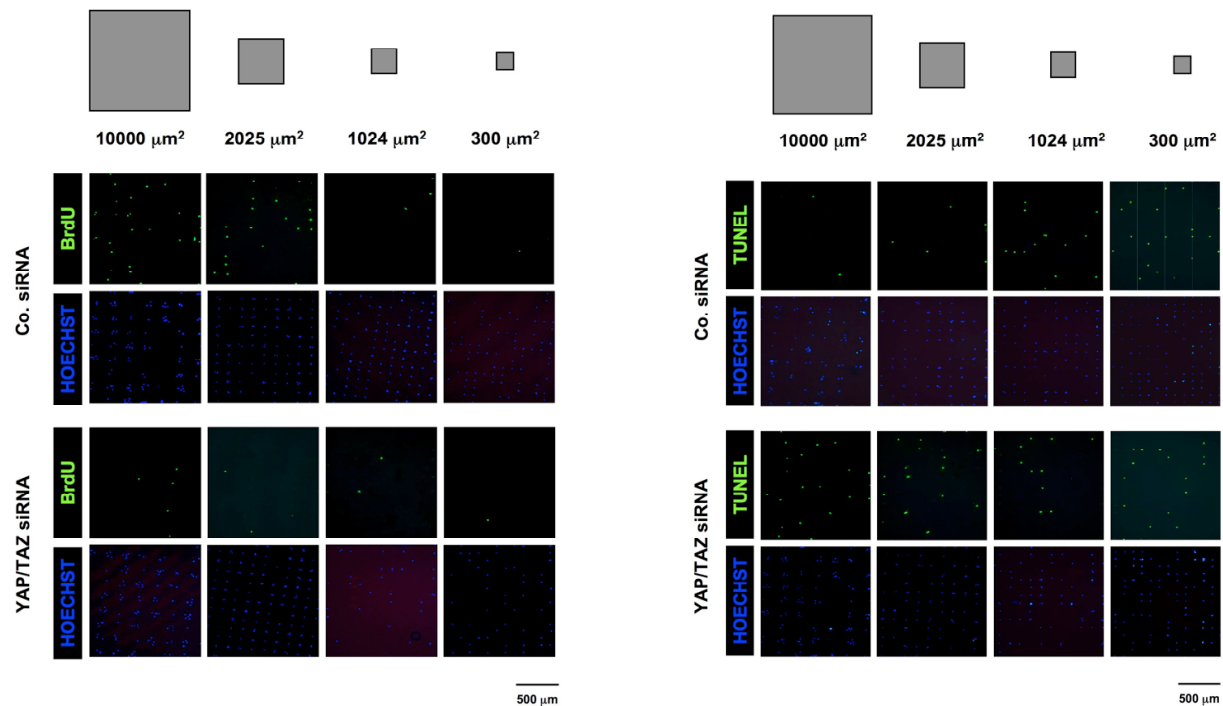

**Supplementary Figure 31** | Representative BrdU stainings (LEFT) and TUNEL stainings (RIGHT) of HMVEC whose quantification is showed in Fig. 4d. Hoechst staining (in blue) shows nuclei of the corresponding fields. Gray squares on top show the relative dimensions of the single patterns where cells were seeded on; the black bar at the bottom right serves as scale bar for the pictures.

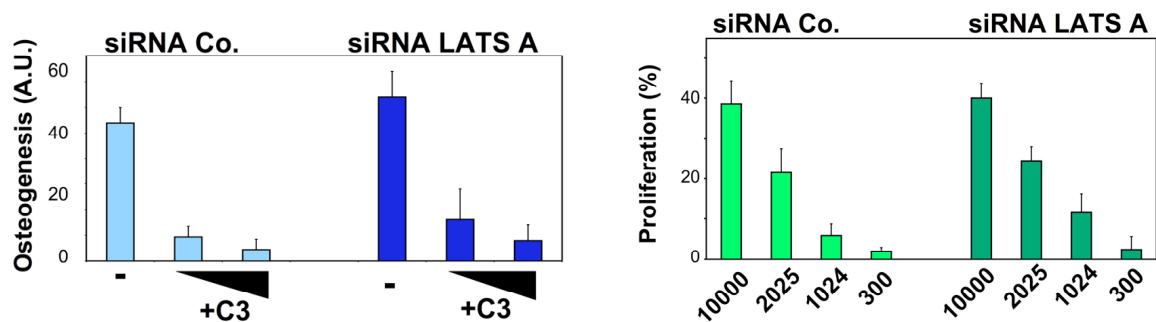

**Supplementary Figure 32** | LEFT: Quantifications of osteogenic differentiation of control siRNA (siRNA Co.) and LATS siRNA (siRNA LATS A) transfected hMSC. Cells were transfected, replated, and induced to differentiate in the absence (-) or in the presence of increasing doses of the Rho inhibitor C3 (+C3; low dose = 50ng/ml, high dose = 150ng/ml). RIGHT: Quantifications of proliferation of HMVEC transfected with the indicated siRNAs and plated on adhesive islands of different sizes, indicated below each column (μm<sup>2</sup>). All data are mean and SD (n=3).

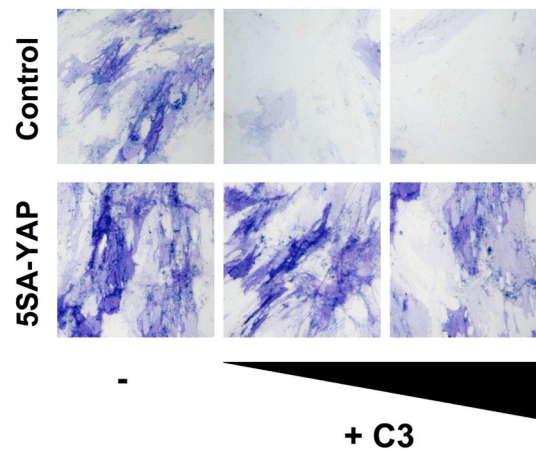

**Supplementary Figure 33** | Representative alkaline phosphatase stainings of the experiments quantified in Fig. 4f. C3, Rho inhibitor used at 50 and 150 ng/ml.
